1 Long-read sequencing reveals novel isoform-specific eQTLs and regulatory mechanisms of  
2 isoform expression

3

4 Yuya Nagura<sup>1</sup>, Mihoko Shimada<sup>1</sup>, Ryoji Kuribayashi<sup>1</sup>, Hiroki Kiyose<sup>1</sup>, Arisa Igarashi<sup>1,2</sup>,  
5 Tadashi Kaname<sup>2</sup>, Motoko Unoki<sup>1</sup>, and Akihiro Fujimoto<sup>1</sup>

6

7 1; Department of Human Genetics, The University of Tokyo, Graduate School of Medicine,  
8 Tokyo, Japan

9 2; Department of Genome Medicine, National Centre for Child Health and Development, Tokyo,  
10 Japan.

11

12

13 Corresponding author:

14 Akihiro Fujimoto

15 Department of Human Genetics, The University of Tokyo, Graduate School of Medicine,  
16 113-0033, Japan;

17 E-mail: [afujimoto@m.u-tokyo.ac.jp](mailto:afujimoto@m.u-tokyo.ac.jp)

18

19

20

21 **Abstract**

22 Genetic variations linked to changes in gene expression are known as expression quantitative  
23 loci (eQTLs). The identification of eQTLs provides a profound understanding of the  
24 mechanisms governing gene expression. However, prior studies have primarily utilized  
25 short-read sequencing techniques, and the analysis of eQTLs on isoforms has been relatively  
26 limited. In this study, we employed long-read sequencing technology (Oxford Nanopore) on B  
27 cells from 67 healthy Japanese individuals to explore genetic variations associated with isoform  
28 expression levels, referred to as isoform eQTLs (ieQTLs). Our analysis revealed 33,928 ieQTLs,  
29 with 69.0% remaining undetected by a gene-level analysis. Additionally, we identified ieQTLs  
30 that have significantly different effects on isoform expression levels within a gene. A functional  
31 feature analysis demonstrated a significant enrichment of ieQTLs at splice sites and specific  
32 histone marks, such as H3K36me3, H3K4me1, H3K4me3, and H3K79me3. Through an  
33 experimental validation using genome editing, we observed that a distant genomic region can  
34 modulate isoform-specific expression. Moreover, an ieQTL analysis and minigene splicing  
35 assays unveiled functionally crucial variants in splicing, which software-based predictions failed  
36 to anticipate. A comparison with GWAS data revealed a higher number of colocalizations  
37 between ieQTLs and GWAS findings compared to gene eQTLs. These findings highlight the  
38 substantial contribution of ieQTLs identified through long-read analysis in our understanding of  
39 the functional implications of genetic variations and the regulatory mechanisms governing  
40 isoforms.

41

## 42 **Introduction**

43 Genetic variations associated with variations in gene expression are referred to as expression  
44 quantitative loci (eQTL). Identifying eQTL offers a deeper understanding of the mechanisms  
45 regulating gene expression [1,2,3]. Previous studies have unveiled that various genetic  
46 variations and genomic features, such as short insertions and deletions (indels), variations of  
47 microsatellites, transposable elements, chromatin states and histone marks, affect the pattern of  
48 gene expression [3,4,5,6]. Additionally, eQTL can help predict causative genes behind diseases  
49 and traits [1,7]. Genome-wide association studies (GWAS) have revealed huge amounts of  
50 genotype-phenotype associations [1,7]. However, a majority of GWAS hits were found in  
51 non-coding regions, posing a significant challenge in understanding their functional roles [1].  
52 Moreover, closely linked variants within a region often exhibit a significant association due to  
53 linkage disequilibrium (LD), making it difficult to discern causative variants from multiple  
54 linked variants. Colocalizing GWAS variants with eQTL can aid in addressing these issues [1,7].  
55 Previous studies have successfully identified causative variants and genes by comparing GWAS  
56 peaks with eQTLs [7-9]. Nevertheless, a colocalization analysis explains only a fraction of  
57 GWAS peaks [10], prompting the need for further eQTL analysis to comprehensively  
58 understand the biological mechanisms underlying diseases.

59         The analysis of isoforms has significant potential for expanding eQTL studies. Genes  
60 produce isoforms of various functions through alternative splicing, and isoforms are an  
61 important functional unit of genes. The impact of isoforms on diseases has been reported. For  
62 instance, splicing abnormalities are frequently observed in many Mendelian diseases, and  
63 changes in isoforms have been linked to the severity of infectious diseases [11,12]. Furthermore,  
64 functional isoforms have been identified in vascular smooth muscle cells [13], and oncogenic  
65 isoforms have been identified in hepatocellular carcinoma, breast cancer, and colon cancer  
66 [14-16]. These findings strongly indicate that isoforms play pivotal roles in the development  
67 and progression of diseases.

68         The recent advent of long-read sequencing technologies enables us to analyze  
69 full-length transcripts. The utilization of long-read sequencing for full-length transcript analysis  
70 enables a comprehensive observation of different isoforms within genes, significantly  
71 contributing to the understanding of gene expression [17,18]. While previous studies have  
72 utilized long reads to detect eQTLs, these efforts typically employed an allele-specific  
73 expression analysis on a limited number of samples or specific genes. Notably, a comprehensive  
74 eQTL analysis covering all isoforms across individuals within a population has yet to be  
75 conducted [17,18]. We propose that an expression analysis using long reads will unveil novel  
76 eQTLs, shed light on new regulatory mechanisms of gene expression, and facilitate the  
77 prediction of functional effects of GWAS variants.

78           In the present study, we sought genetic variations associated with isoform expression  
79 levels (referred to as isoform eQTLs, or ieQTLs). To achieve this, we performed an isoform  
80 analysis using long-read sequencing technology (Oxford Nanopore) on 67 immortalized B cell  
81 lines from healthy Japanese individuals [19]. Subsequently, we investigated the relationship  
82 between genetic variations and isoform expression levels. This analysis unveiled  
83 isoform-specific QTLs that have largely remained unreported in previous studies, underscoring  
84 the importance of a full-length transcriptome approach in human genetics.

85

## 86 **Material and Methods**

### 87 *Samples and cDNA sequencing*

88 Sixty-seven Japanese B cell samples from the 1000 Genomes Project were obtained from the  
89 Coriell Institute [19]. Institutional review boards (IRBs) at the University of Tokyo approved  
90 this work (2022121Ge). B cells were cultured in RPMI1640 medium (Nacalai) supplemented  
91 with 10% fetal bovine serum (FBS) and penicillin/streptomycin at 37°C in a 5% CO<sub>2</sub>  
92 (Additional file 2: Table S1). Human embryonic kidney 293 (HEK293) cells were obtained  
93 from American Type Culture Collection and maintained in Dulbecco's Modified Eagle Medium  
94 (DMEM) supplemented with 10% FBS and penicillin/streptomycin at 37°C in a 5% CO<sub>2</sub>. RNA  
95 extraction was carried out using the RNeasy Mini Kit (QIAGEN). Full-length cDNA was  
96 synthesized from 1 µg of total RNA using the SMARTer PCR cDNA Synthesis Kit (Takara)  
97 following the manufacturer's instructions. Subsequently, primers for cDNA synthesis were  
98 digested with exonuclease I (NEB) at 37 °C for 30 minutes. After purification with Agencourt  
99 AMPure XP magnetic beads (Beckman Coulter), libraries were constructed using the Ligation  
100 Sequencing Kit (SQK-LSK109) (Oxford Nanopore) as per the manufacturer's protocol.  
101 Sequencing was performed on a Flow Cell (R9.4) (Oxford Nanopore) using the MinION  
102 sequencer (Oxford Nanopore). Basecalling from FAST5 files was conducted using Guppy  
103 software (version 3.0.3) (Oxford Nanopore).

104

### 105 *Estimation of the isoform expression level*

106 We estimated the expression levels of isoforms using our previously developed analysis  
107 pipeline, SPLICE [14]. Initially, SPLICE filtered out reads of low quality (average quality score  
108 < 15) and then aligned the remaining reads to the human reference genome (GRCh38) using  
109 minimap2 [20]. Subsequently, the mapped reads were annotated based on data from the  
110 GENCODE (version 28) and RefSeq (release 88) databases. The analysis provided the number  
111 of mapped reads corresponding to each isoform. These read counts were standardized to  
112 (number of reads)/(1M reads) for each isoform within each sample and were utilized as the  
113 expression level for each isoform. Subsequent analyses focused on genes located on autosomes.

114

115 *Polymorphism of the 67 Japanese individuals and annotation of variants*

116 The genotype data for single nucleotide variants (SNVs) and short indels were sourced from the  
117 1000 Genomes (1000G) database [19]. Single nucleotide polymorphisms (SNPs) and  
118 polymorphic indels were selected based on the following criteria using PLINK software [21]:  
119 call rate > 90%, p-value indicating departure from Hardy-Weinberg equilibrium > 0.001, and  
120 minor allele frequency (MAF) > 1%.

121 To assess the functional impact of SNPs and indels, we classified them into 9  
122 categories: exon, intron, 5' untranslated region (5' UTR), 3' UTR, 5' splice sites (-2 bp~+5 bp  
123 from the 5' end of intron), splice donor sites, 3' splice sites (-2 bp ~ +5 bp from the 3' end of  
124 intron), splice acceptor sites, and branch point regions [22].

125 The annotation of known regulatory regions was obtained from the Ensemble database,  
126 specifically from B cell line (GM12878) data [23]. The locations of super enhancers in  
127 GM12878 were retrieved from the dbSUPER database [24]. Positions in GRCh37 were  
128 converted to GRCh38 using the 'liftover' command in PLINK software. Information regarding  
129 histone modifications and transcription factor binding sites (TFBSs) in the B cell line was  
130 sourced from the Encyclopedia of DNA Elements (ENCODE) database. We filtered data from  
131 the 'Experiment Matrix' under the following conditions: Status - released, Perturbation - not  
132 perturbed, Organism - Homo sapiens, Genome assembly - GRCh38, and Available file types -  
133 bed narrowPeak. After filtering based on 'Audit category' (Red icon and orange icon), data from  
134 280 files were utilized for this study [25].

135

136 *Identification of isoform eQTL (ieQTL)*

137 We generated expression data for each isoform (Figure 1AB). Our primary goal in this study  
138 was to identify cis-eQTLs for each gene, focusing on genetic variations within the cis-window  
139 defined as 1 Mb from the transcription start site (TSS) and transcription end site (TES) of each  
140 gene. To analyze the association between isoform expression levels and genetic variations, we  
141 employed the matrix-eQTL package in R [26].

142 Next, we computed the number of tests within each cis-window to correct for multiple  
143 testing. Due to varying numbers of genetic variations and their high correlation resulting from  
144 LD, we determined the number of tests for each cis-window through LD pruning using PLINK  
145 software. LD pruning was conducted for variants with MAF > 3% using the following  
146 parameters: “window size in SNP” = 100, “The number of SNPs to shift the window at each  
147 step” = 5, and  $r^2 > 0.5$ . Multiple test corrections for each cis-window was performed using the  
148 Bonferroni method based on the number of variants post LD pruning. Variants with  
149 Bonferroni-corrected p-values < 0.05 were deemed significant.

150 Due to the potential influence of LD, variants that are not causative may display low  
151 p-values. For genes or isoforms with more than 3 variants demonstrating Bonferroni-corrected  
152 p-values  $< 0.05$ , we employed the Finemap program [27] to identify potential causative variant  
153 candidates. Finemap computes the posterior probability that a set of variants is causal among all  
154 candidate variants. In this study, we considered sets with the highest posterior probability as  
155 causal variants, defining them as ieQTLs. Genes or isoforms with  $\leq 2$  variants showing  
156 Bonferroni-corrected p-values  $< 0.05$  were not subjected to the Finemap analysis, and all  
157 variants within these cases were considered ieQTLs.

158

#### 159 *Identification of gene eQTL*

160 We also examined the expression levels of genes (Figure 1AB). This involved calculating the  
161 sum of read numbers for isoforms within each gene. The read counts for each gene were then  
162 standardized to (number of reads)/(1M reads) within each sample and utilized as the expression  
163 level for each gene. The process for identifying gene eQTLs was conducted similarly to the  
164 approach used for identifying ieQTLs.

165

#### 166 *Comparison with previous studies*

167 We conducted a comparison between our eQTL list and a previously conducted eQTL study,  
168 utilizing the eQTL data retrieved from the Genotype-Tissue Expression (GTEx) database [28].  
169 Additionally, we also assessed the colocalization of our eQTLs with variants that showed  
170 significant associations in previous GWAS. We collected variants with associations from prior  
171 GWAS through the GWAS catalog database [29] and verified the presence of these SNPs in our  
172 eQTL list.

173

#### 174 *Classification of ieQTL based on the effects on expression*

175 Many genes express multiple isoforms, and each ieQTL can exert distinct effects on different  
176 isoforms within a gene (Figure 1AB). For instance, a SNP might positively regulate the  
177 expression of one isoform while negatively impacting another isoform (Figure 1C). To identify  
178 such ieQTL variations, we compared the  $\beta$  values derived from regression analyses of ieQTLs.  
179 Since the difference in  $\beta$  values conforms to a t-distribution, we employed a t-test to evaluate  
180 these differences. Two types of ieQTLs were categorized based on the analysis of  $\beta$  values.  
181 ieQTLs exhibiting significantly different effects (p-value  $< 0.01$ ) on distinct isoforms within a  
182 single gene were termed 'differential ieQTLs' (Figure 1C). Among these, ieQTLs with  $\beta$  values  
183 displaying opposite signs were termed 'opposite ieQTLs' (Figure 1C).

184

185 We conducted a multiple regression analysis on normalized  $\beta$  values of eQTLs using  
the lm function in R software. The independent variables considered were distance from TSS,

186 conservation score (the average phyloP100way score within 200 bp), annotations (such as  
187 Activity-by-Contact (ABC) enhancer, CCTC-binding factor (CTCF) binding site, histone H3  
188 trimethylation at lysine 36 (H3K36me3), SS3 (3' splice site), SS5 (5' splice site), TFBS, 3' UTR,  
189 5' UTR, acceptor, branch, donor, enhancer, exon, intron, open chromatin region, promoter,  
190 promoter flanking region, super enhancer), and MAF. The step() function was utilized for the  
191 parameter selection.

192 The impact of genetic variations on splicing was estimated using the SpliceAI website  
193 [30].

194

#### 195 *Enrichment analysis*

196 To assess the potential enrichment of biological features among ieQTLs, we tallied counts for  
197 each regulatory feature observed in ieQTLs and compared them to counts found in non-causal  
198 variants. We categorized eQTLs into several groups and compared them as follows: (i) ieQTLs  
199 vs. no eQTLs, (ii) gene eQTLs vs. no eQTLs, (iii) common, which were common to both  
200 ieQTLs and gene eQTLs, vs. no eQTLs, (iv) differential ieQTLs vs. other ieQTLs, and (v)  
201 opposite eQTLs vs. other ieQTLs. We compared the regulatory features between these  
202 categorized groups using Fisher's exact test. The analysis incorporated biological features  
203 outlined in '*Polymorphism of the 67 Japanese individuals and annotation of variants*'.

204

#### 205 *Identification of motifs in isoforms affected by ieQTLs*

206 We compared the major and minor isoforms influenced by ieQTLs. We defined the most  
207 abundant isoform as the major isoform and others as minor isoforms. The coding sequences of  
208 isoforms were translated into amino acids. Motifs were estimated for each isoform using  
209 HMMER software with default settings [31]. Amino acid sequences and predicted domains  
210 were then compared among the isoforms.

211

#### 212 *Minigene splicing assay*

213 To assess the impact of two SNPs (*interferon induced protein 44 like (IFI44L) IVS2+3T/A*  
214 (*rs1333973*) and *growth arrest specific 2 (GAS2) IVS1+3G/A (rs11026723)*) on splicing, we  
215 conducted minigene splicing assays. For the analysis of *rs1333973*, a genomic segment 1753 bp  
216 in length encompassing the intron, 2nd exon, and 3rd exon of *IFI44L* gene was amplified and  
217 cloned into the pSPL3 plasmid vector (NovoPro Bioscience Inc.) (Additional file 1: Figure S1).  
218 The alternative allele was generated using the PrimeSTAR Mutagenesis Basal Kit (Takara Bio).  
219 Regarding the analysis of *rs11026723*, a genomic segment 589 bp in length and inclusive of the  
220 upstream flanking region, 1st exon, and intron of *GAS2* gene (NM\_177553.2) was amplified  
221 and cloned into the pSPL3 vector. Subsequently, we deleted the 1st exon of the pSPL3 vector

222 and the upstream flanking region of *GAS2* gene using the PrimeSTAR Mutagenesis Basal Kit.  
223 The alternative allele was generated using the same mutagenesis kit (Additional file 1: Figure  
224 S1).

225 Four vectors (pSPL3 with *IFI44L* IVS2+3T, *IFI44L* IVS2+3A, *GAS2* IVS1+3G, or  
226 *GAS2* IVS1+3A) were transfected into HEK293 cells utilizing FuGENE HD Transfection  
227 Reagent (Promega). Forty-eight hours post-transfection, RNA extraction from the cells was  
228 carried out using the RNeasy Mini Kit (QIAGEN). The total RNA underwent reverse  
229 transcription (RT) with the PrimeScript RT Reagent Kit with gDNA Eraser (Perfect Real Time)  
230 (Takara Bio). Subsequently, RT-PCR was performed (Additional file 2: Table S2), and the  
231 resulting amplicons were assessed via electrophoresis using a 2% agarose gel. Amplicons  
232 obtained through *IFI44L* IVS2+3T and *GAS2* IVS1+3G were purified using the QIAquick Gel  
233 Extraction Kit (QIAGEN) and subsequently sequenced using the Sanger sequencing method. A  
234 purified product derived from pSPL3 with *IFI44L* IVS2+3T contained multiple amplicons and  
235 underwent TA cloning with T-Vector pMD20 (Takara Bio). Eight colonies were selected for  
236 colony-PCR and subsequently sequenced using the Sanger sequencing method.

237

### 238 *Deletion with CRISPR-Cas9 system and examination of gene expression level*

239 Our analysis identified numerous ieQTLs located outside of genes. To validate the impact of  
240 ieQTLs on gene expression, we induced a deletion in HEK293 cell lines using the Alt-R  
241 CRISPR-Cas9 System (Integrated DNA Technologies). We deleted the flanking region of  
242 rs11191660 (chr10:103343208 A/G), which was significantly associated with the expression  
243 level of an isoform (NM\_032747.3) of the *ATP synthase membrane subunit K (ATP5MK)* gene.  
244 Two guide RNAs (gRNAs) were specifically designed for generating a deletion (Additional file  
245 2: Table S3). Ribonucleoprotein complexes containing these gRNAs were formed and  
246 transfected into HEK293 cells using the Neon Transfection System (Thermo Fisher Scientific)  
247 with voltage = 1,150 V, width settings = 20, and pulse number = 2. The presence of the deletion  
248 in transfected cells was confirmed by PCR. The transfected cells were then separated into three  
249 wells and cultured. After 8-23 days post-transfection, DNA and RNA were extracted from the  
250 cells using the QIAamp DNA Mini Kit and RNeasy Mini Kit, respectively (QIAGEN).

251 The expression levels of the *ATP5MK* gene isoforms were assessed through RT-PCR  
252 quantification. Total RNA underwent reverse transcription using the PrimeScript RT Reagent  
253 Kit with gDNA Eraser (Perfect Real Time) (Takara). PCR primers were designed to amplify  
254 each isoform (Additional file 2: Table S2). The resulting cDNA was employed for quantitative  
255 PCR (qPCR) with KAPA SYBR Fast qPCR KIT (KAPA Biosystems) using CFX-Connect  
256 Real-Time System (Bio-Rad), utilizing *Actin beta (ACTB)* as an internal control (Additional file  
257 2: Table S2). The biological triplicate samples with and without deletions were used for



258 real-time PCR in technical triplicate, and the relative quantification (RQ) values were calculated.  
259 Statistical significance of the RQ values between cells with and without the deletion was  
260 determined using the Student's t-test.

261

## 262 **Results**

### 263 *cDNA sequencing and estimation of expression level*

264 We sequenced cDNA obtained from 67 Japanese B cell lines. The average data yield was 15.8  
265 Gbp, and the average number of reads was 13.1 million (Additional file 2: Table S1, S4). The  
266 average read length was 1222.6 bp. Subsequently, reads were aligned to the human reference  
267 genome (GRCh38) using minimap2 software [20]. Annotation of the reads and detection of the  
268 isoform expression levels were performed using SPLICE software [14]. Among the genes in  
269 autosomes, a total of 43,581 isoforms (representing 15,353 genes) were expressed (Additional  
270 file 2: Table S4). Of these, 6,832 were not identified in the Refseq or GENCODE databases;  
271 hence, they were classified as novel.

272

### 273 *Identification of ieQTL and gene eQTL*

274 Based on the expression levels of each isoform and genotype data, we detected ieQTLs.  
275 Additionally, we computed the total number of reads mapped to each gene to identify gene  
276 eQTLs. Our analysis revealed 33,928 ieQTLs affecting 12,202 isoforms (from 7,683 genes) and  
277 12,668 gene eQTLs (from 4,344 genes) (Figure 1D, Additional file 2: Table S5). Out of these,  
278 10,520 were common to both ieQTLs and gene eQTLs, 23,408 were ieQTL-specific, and 2,148  
279 were specific to gene eQTLs (Figure 1D). ieQTLs accounted for 0.45% of all analyzed variants  
280 (7,484,843 non-redundant variants within 1 Mbp of cis-windows). Among the ieQTLs, 1,775  
281 were identified as differential ieQTLs, and 221 exhibited opposite effects (Figure 1E,  
282 Additional file 2: Table S6, 7). A subsequent comparison of p-values between ieQTLs and gene  
283 eQTLs for each variant revealed that numerous variants displayed lower ieQTL p-values than  
284 gene eQTL p-values, suggesting that ieQTLs are distinct and not statistical artifacts arising from  
285 gene eQTL identification (Figure 1F). A comparison of our eQTL list with GTEx eQTL and  
286 sQTL studies using lymphocyte samples demonstrated that 86.7% and 88.2% of the identified  
287 eQTLs were not detected, respectively (Additional file 1: Figure S2).

288 Our analysis identified a larger number of ieQTLs compared to gene eQTLs. In this  
289 analysis, we conducted multiple test corrections based on the number of variants within 1 Mbp  
290 from genes. As the total number of isoforms exceeded the number of genes, the number of tests  
291 became greater for ieQTLs ( $n = 43,581$ ) than for gene eQTLs ( $n = 15,353$ ), potentially  
292 contributing to the higher count of ieQTLs. To examine this hypothesis, we adjusted the  
293 p-values of the ieQTL analysis using the Bonferroni correction considering the number of

294 isoforms and variants for each gene. Since the expression levels of isoforms within the same  
295 gene may not be entirely independent, this correction might be overly conservative. Despite this  
296 correction, we still identified 25,205 ieQTLs, of which 15,422 were not identified as gene  
297 eQTLs. These findings indicate that the ieQTL analysis revealed a larger number of regulatory  
298 variants compared to the gene-based analysis.

299

### 300 *Features of ieQTLs and gene eQTLs*

301 To explore functional features associated with ieQTLs, we conducted an enrichment analysis for  
302 27 functional categories (gene location, regulatory regions, histone modifications, and TFBSs)  
303 across three distinct groups: ieQTLs exclusively found in the ieQTL group (ieQTL-specific),  
304 those exclusively present in the gene eQTL group (gene eQTL-specific), and those commonly  
305 found in both the ieQTL and gene eQTL groups (common) (Figure 2A-C, Additional file 2:  
306 Table S8). Following multiple test corrections, 26 categories exhibited significance within the  
307 ieQTL-specific group. As expected, the ieQTL-specific group showed a significant enrichment  
308 in acceptor sites, donor sites, 3' splice sites, and 5' splice sites with high odds ratios (OR)  
309 (acceptor site: p-value= $1.3 \times 10^{-8}$ , OR=6.4; donor site: p-value= $3.1 \times 10^{-6}$ , OR=5.1; 3' splice site:  
310 p-value= $7.8 \times 10^{-14}$ , OR=5.4; 5' splice site: p-value= $3.8 \times 10^{-23}$ , OR=4.7). Additionally, significant  
311 enrichments were observed in promoters, branchpoints within introns, and super enhancers  
312 (promoter: p-value= $2.2 \times 10^{-198}$ , OR=2.5; branchpoint: p-value= $1.7 \times 10^{-13}$ , OR=2.2; super  
313 enhancer: p-value= $4.6 \times 10^{-23}$ , OR=2.1). Within the gene eQTL-specific group, 14 categories  
314 showed significant enrichment. Promoters exhibited the highest odds ratio, followed by 3' UTRs,  
315 TFBSs, exons, and 5' UTRs (promoter: p-value= $9.4 \times 10^{-40}$ , OR=3.4; 3' UTR: p-value= $2.9 \times 10^{-11}$ ,  
316 OR=2.0; TFBS: p-value= $1.9 \times 10^{-18}$ , OR=1.8; exon: p-value= $1.9 \times 10^{-11}$ , OR=1.8; 5' UTR:  
317 p-value= $9.9 \times 10^{-5}$ , OR=1.6). Subsequently, we compared the number of variants within each  
318 category between the ieQTL-specific group and the gene eQTL-specific group (Figure 2A-C,  
319 Additional file 2: Table S9). The proportion of eQTLs present in super enhancer and  
320 H3K36me3 regions was significantly higher within the ieQTL-specific group (super enhancer:  
321 p-value= $5.1 \times 10^{-5}$ , OR=5.1; H3K36me3: p-value= $1.6 \times 10^{-5}$ , OR=1.3), while the proportion in  
322 promoters was greater in the gene eQTL-specific group (p-value= $6.8 \times 10^{-4}$ , OR=0.74).

323 We conducted an enrichment analysis for 126 TFBSs (Additional file 2: Table S10).  
324 Following multiple test corrections, 115 TFBSs exhibited a significant enrichment in the  
325 ieQTL-specific group, while 78 were significantly enriched in the gene eQTL-specific group.  
326 The proportion of CAMP responsive element binding protein 1 (CREB1) binding sites showed  
327 a significant difference between the ieQTL-specific group and the gene eQTL-specific group  
328 (Additional file 2: Table S11). These findings suggest that the regulatory mechanism governing  
329 isoform expression differs, at least partially, from that of genes (Figure 2A-C).

330

331 *Features of differential eQTLs and opposite eQTLs*

332 We then proceeded with an enrichment analysis within the differential ieQTL group and the  
333 opposite ieQTL group (Figure 2D-F, Additional file 2: Table S12). After multiple test  
334 corrections, 16 categories, including 3' and 5' splice sites, exhibited significances in the  
335 differential ieQTL group (3' splice site:  $p\text{-value}=1.1\times 10^{-4}$ ,  $OR=11.2$ ; and 5' splice site:  
336  $p\text{-value}=8.9\times 10^{-12}$ ,  $OR=13.4$ ). In the opposite ieQTL group, 16 categories were significant.  
337 Among these, 3' and 5' splice sites in the differential ieQTL group displayed particularly high  
338 odds ratios (donor sites:  $p\text{-value}=2.8\times 10^{-4}$ ,  $OR=84.0$ ; 3' splice site:  $p\text{-value}=2.8\times 10^{-5}$ ,  $OR=54.4$ ;  
339 and 5' splice site:  $p\text{-value}=1.7\times 10^{-12}$ ,  $OR=63.1$ ). We subsequently compared the variants within  
340 each category between the differential group and other ieQTLs, as well as between the opposite  
341 ieQTL group and other ieQTLs (Figure 2D-F, Additional file 2: Table S13). The proportion of  
342 variants in exons, introns, and 5' splice sites was significantly higher in the differentiated ieQTL  
343 group than in other ieQTLs (Figure 2D). Moreover, several histone marks, including  
344 H3K36me3, H3K4me1, H3K4me3, and H3K79me3, were significantly enriched in opposite  
345 ieQTLs compared to other ieQTLs (Figure 2F). Additionally, we conducted an enrichment  
346 analysis for 126 TFBSs (Additional file 2: Table S14, S15). Of these, 69 and 5 TFBSs were  
347 significantly enriched in the differential and opposite groups, respectively.

348

349 *Effects of ieQTLs*

350 We analyzed the distribution of eQTLs (ieQTL-specific, common, and gene eQTL-specific  
351 groups) relative to the gene body (Figure 3A). The gene eQTL-specific group displayed a  
352 singular peak distribution, centered around the TSS. Conversely, the distribution of the  
353 ieQTL-specific group exhibited an additional peak around the TES. The common group showed  
354 an intermediate pattern between the gene eQTL-specific group and ieQTL-specific group. These  
355 observed patterns are consistent with findings from a prior study [17].

356 To examine the factors influencing the effect of eQTLs, we conducted a multiple  
357 regression on the effect sizes ( $\beta$  values) while considering various annotations of eQTLs  
358 (regulatory features, distance from TSS, MAF, and average conservation score within 200 bp)  
359 (Additional file 2: Table S16). We specifically examined genes with five or more isoforms.  
360 Following the selection of independent variables, eight features (conservation, ABC enhancer,  
361 5' splice site, donor site, enhancer, exon, intron, and MAF) were associated with the effect sizes  
362 of the ieQTL-specific group. Conversely, two factors (CTCF binding site and MAF) were  
363 associated with the effect sizes within the gene eQTL-specific group (Additional file 2: Table  
364 S16).

365 We subsequently examined differences in amino acid sequences and motifs in  
366 isoforms affected by ieQTLs (Figure 3B, Additional file 2: Table S17). Specifically, we focused  
367 on ieQTLs that influenced coding genes. Within this analysis, we categorized isoforms based on  
368 their expression levels, designating the most abundant isoform as the major isoform and others  
369 as minor isoforms. We specifically selected minor isoforms influenced by ieQTLs and  
370 compared their amino acid sequences with those of the major isoforms (Figure 3B). Among the  
371 33,928 ieQTLs identified, 26,816 affected minor isoforms. Among these, 30.4% (8,149/26,816)  
372 displayed a distinct amino acid sequence from the major isoforms, while 16.5% (4,419/26,816)  
373 exhibited different functional domains. These findings suggest that ieQTLs have the potential to  
374 induce functional alterations.

375 Combining eQTL and GWAS data has proven effective at predicting causative  
376 variants [7]. Hence, we examined whether the identified QTLs corresponded to  
377 disease-associated variants previously reported in GWAS studies. We found that 1.0% of the  
378 gene eQTL-specific group (22/2,148), 1.6% of the ieQTL-specific group (379/23,408), and  
379 1.7% of the common eQTLs (183/10,520) were present among GWAS-associated variants  
380 (Figure 3C, Additional file 2: Table S5). Interestingly, the proportion of GWAS variants was  
381 higher in the ieQTL-specific group than in the gene eQTL-specific group (Fisher's exact test,  
382 p-value = 0.036, OR=1.6). This finding suggests that an ieQTL analysis aids in identifying  
383 novel mechanisms underlying diseases.

384

#### 385 *Prediction of impact on splicing and validation by minigene splicing assay*

386 Within the ieQTL-specific group, there were 146 variants in 3' or 5' splice sites, and 37 variants  
387 in donor or acceptor sites (Additional file 2: Table S5). Among these ieQTLs, we selected 94  
388 variants present in affected genes and predicted their functional impact on splicing using  
389 SpliceAI software (Additional file 2: Table S18) [30]. Out of these, 18 eQTLs had a score  $\geq 0.8$   
390 ("high precision" score by SpliceAI), and 12 had a score between 0.5 and 0.8 ("recommended"  
391 score by SpliceAI).

392 To investigate whether variants with low SpliceAI scores affect splicing, we chose two  
393 variants in the 3rd position of introns with low scores (*IFI44L* IVS2+3T/A and *GAS2*  
394 IVS1+3G/A) for minigene splicing assays (Figure 4A-I, Additional file 2: Table S18). *IFI44L*  
395 IVS2+3A/T (rs1333973) is in the 3rd position of intron2 of the *IFI44L* gene. In the eQTL  
396 analysis, *IFI44L* IVS2+3T/A (rs1333973) did not impact the overall expression level of *IFI44L*  
397 gene but exhibited opposing effects on isoforms (Figure 4D). NM0068020.3 and  
398 XM\_0115405392 showed the highest expression in A/A individuals, while XM\_005270391.3  
399 and XM\_017000120.1 showed the highest expression in T/T individuals. The minigene splicing  
400 assay showed that *IFI44L* IVS2+3T/A affects the splicing pattern. *IFI44L* IVS2+3T (Figure 4E

401 lane 2) reduced the amount of longer fragments (exon2-3) and generated short fragments caused  
402 by the skipping of exon 2 and splicing aberration.

403 *GAS2* IVS1+3G/A is located in the 3rd position of the first intron of *GAS2* gene and  
404 primarily associated with the expression level of one isoform (NM\_177553.2) (Figure 4H). In  
405 the minigene splicing assay, *GAS2* IVS1+3A generated the *GAS2* short fragment (228 bp)  
406 through splicing (Figure 4I lane 1), whereas *GAS2* IVS1+3G only produced the unspliced  
407 fragment (Figure 4I lane 2). This result suggests that *GAS2* IVS1+3G/A strongly affects the  
408 splicing.

409

#### 410 *Experimental validation of influence of a SNP on isoform-specific expression*

411 Our analysis revealed numerous ieQTLs located at a distance from the target gene, implying the  
412 involvement of regions outside the gene in regulating isoform expression (Figure 3A). To  
413 directly establish their functional impact, we induced a deletion in HEK293 cells (Additional  
414 file 1: Figure S3) and assessed its effect on gene expression levels using quantitative real-time  
415 RT-PCR. For this experiment, we specifically targeted regions containing a variant rs11191660  
416 (Figure 5A). While rs11191660 showed a significant association with the expression level of an  
417 isoform (NM\_032747.3) of the *ATP5MK* gene (A/A individuals showed the highest expression),  
418 its association with other isoforms was not statistically significant (ENST00000369825.5) or  
419 opposite (NM\_001206426.1 and NM\_001206427.1) (Figure 5BC). We generated a deletion of  
420 686 bp (chr10:103,342,876-103,343,562) within the region harboring rs11191660 using the  
421 CRISPR-Cas9 system in HEK293 cells (Additional file 1: Figure S3, Additional file 2: Table  
422 S2). Subsequently, qPCR was performed (Additional file 2: Table S2). The results demonstrated  
423 that cells with the deletion exhibited significantly lower gene expression levels for  
424 NM\_032747.3 (t-test p-value =  $1.5 \times 10^{-6}$ ) (Figure 5D). In contrast, the influence on the  
425 expression levels of other isoforms (NM\_001206426.1 and NM\_001206427.1) was either  
426 weaker or insignificant (Figure 5D). These findings strongly suggest that the region containing  
427 rs11191660 plays a functional role in regulating isoform expression.

428

#### 429 **Discussion**

430 The expression patterns of isoforms vary among tissues and between cancerous and  
431 non-cancerous tissues [14,15,16,17,18]. These variations likely lead to functional changes in  
432 genes and regulate diverse biological processes [14,15,16,17,32]. Despite the intriguing nature  
433 of the regulatory mechanisms governing isoform expression, this area remains understudied. To  
434 uncover ieQTLs, we conducted an eQTL analysis using long-read sequencing technology,  
435 revealing 33,928 ieQTLs, of which 69.0% (23,408/33,928) were undetected by a gene-level  
436 analysis (Figure 1D). Upon examining the expression changes, we identified 1,775 differential

437 ieQTLs that were difficult to detect via the gene-level analysis (Figure 1E). Additionally, we  
438 identified 221 opposite ieQTLs, representing an extremely distinctive pattern. These findings  
439 strongly indicate that an ieQTL analysis unveils a larger number of eQTLs compared to a  
440 gene-based eQTL analysis.

441 To explore the regulatory mechanisms of isoforms, we conducted an enrichment  
442 analysis (Figure 2). While the majority of the results were similar between gene eQTLs and  
443 ieQTLs, promoters were significantly overrepresented in the gene eQTL-specific group,  
444 whereas acceptor sites, 5' splice sites, 3' splice sites, and H3K36me3 were notably  
445 overrepresented in the ieQTL-specific group (Figure 2A-C). This finding suggests that  
446 promoters play a more substantial role in overall gene expression, while variants in splicing  
447 motifs and H3K36me3, which is a marker generally accumulated on the gene-body of active  
448 genes, influence isoform expression. The enrichment analysis of opposite ieQTLs showed very  
449 strong enrichment in 5' and 3' splice sites (Figure 2D), suggesting that the most opposite QTLs  
450 can be caused by variants in splicing sites. Additionally, several histone marks, including  
451 H3K36me3, H3K4me1, H3K4me3, and H3K79me2, showed a significant enrichment in  
452 opposite ieQTLs (Figure 2F). These histone marks are known as splicing-associated chromatin  
453 signatures [33]. Although a previous large-scale eQTL study using short reads showed a higher  
454 enrichment of H3K36me3 in splicing QTL (sQTL) than in eQTL, other histone marks were not  
455 reported [2]. Thus, our long-read eQTL study will contribute to a deeper understanding of the  
456 mechanisms regulating isoform expression.

457 In addition to variants within genes, our analysis showed that 82.5% of ieQTLs  
458 (28,004/33,928) were outside genes (Figure 3A, Additional file 2: Table S5). A multiple  
459 regression analysis revealed that variations in ABC enhancers and enhancers could account for  
460 differences in the effect size of ieQTLs (Additional file 2: Table S16). Furthermore, our  
461 genome-editing experiment indicated that a region approximately 60 kbp distant from *ATP5MK*  
462 gene can influence isoform expression (Figure 5). Although the functional mechanism behind  
463 this expression regulation remains unclear, the HaploReg website predicts that rs11191660 G/A  
464 can alter the activator protein 1 (AP-1) binding motif (Additional file 1: Figure S4) [34]. AP-1  
465 has been associated with long-range enhancer interactions, which control transcription [35].  
466 Consequently, this SNP might influence isoform expression through modulation of the 3D  
467 chromatin structure. This result suggests that intergenic regions, including enhancers, can  
468 regulate isoform expression.

469 Our analysis revealed isoform-specific expression changes caused by variants in splice  
470 sites (Figure 4). We selected two variants at the 3rd position of introns for experimental  
471 validation (*IFI44L* IVS2+3T/A and *GAS2* IVS1+3G/A). Although a prior study suggested that  
472 *IFI44L* IVS2+3T/A induces splicing alterations [36], experimental validation has not been

473 conducted. Furthermore, SpliceAI software predicted a low functional impact for the SNP  
474 ( $\Delta$ scores = 0.34) (Additional file 2: Table S18). Therefore, conducting functional experiments to  
475 determine the causality of this SNP is needed. In the minigene assay, *IFI44L* IVS2+3T/A  
476 caused a change in the splicing pattern, resulting in the generation of shorter isoforms,  
477 consistent with the data analysis (Figure 4D). Another variant (*GAS2* IVS1+3G/A), which also  
478 exhibited a low SpliceAI  $\Delta$ score ( $\Delta$ scores = 0.35), significantly influenced the splicing pattern  
479 (Figure 4H, Additional file 2: Table S18). In the minigene assay, splicing did not occur in the  
480 transcript from *GAS2* IVS1+3G vector, indicating a crucial role for the 3rd position in splicing.  
481 Considering its high evolutionary conservation (Additional file 1: Figure S4), this site likely  
482 holds significant functional importance. Because this variant affected the expression level of  
483 only one isoform (Figure 4H), this pattern should be difficult to detect using short-read  
484 sequencing. Overall, we believe that the functional impact of variants in splice sites cannot be  
485 accurately predicted solely by software and short-read analysis. This underscores the significant  
486 advantage of eQTL analysis employing long-read sequencing.

487 Through our analysis, we identified genes affected by eQTLs. Among these, *ACTB*,  
488 which has been commonly utilized as an internal control in expression analyses, exhibited the  
489 highest  $\beta$  values (Additional file 2: Table S5). Although the normalized  $\beta$  value (normalized  
490 contribution of the eQTL to the total expression of *ACTB*) for this ieQTL is not high, it could  
491 potentially contribute to differences in the expression levels of *ACTB* among individuals. This  
492 finding suggests that caution may be necessary when using *ACTB* as a control in certain  
493 contexts (Additional file 2: Table S5).

494 Integrating eQTL and GWAS contributes significantly to understanding the biological  
495 mechanisms behind diseases and traits. Our investigation revealed 584 eQTLs present in  
496 GWAS results (Figure 3C). Among these, 64.9% (n=379) were exclusively identified within  
497 ieQTLs, which is difficult to detect by a gene-level analysis. This result strongly suggests that a  
498 colocalization analysis of ieQTLs could uncover novel causative genes in GWAS. A recent  
499 study reported that only a small fraction of GWAS peaks coincide with eQTLs, which has  
500 raised concerns about a 'missing regulation' issue [37]. The consideration of ieQTLs helps to  
501 identify a larger number of regulatory variants and could contribute to addressing a part of this  
502 concern.

503 Moreover, the ieQTL analysis suggested a contribution of isoforms to disease. For  
504 example, an ieQTL against an isoform (XM\_005270391.3) of *IFI44L* gene, which was affected  
505 by ieQTL is in 5' splice site (Figure 4), was reported to be associated with immune responses to  
506 measles vaccine [38]. This splicing affects the expression level of two isoforms, of which one  
507 isoform (XM\_005270391.3) lacks functional domains (Figure 4C) and whose changes should

508 strongly affect the function of this gene. *ATP5MK* has associations with various phenotypes,  
509 such as height, smoking status, and risk of systemic lupus erythematosus, indicating that this  
510 isoform-specific regulation may have clinical importance [39-41] (Figure 5). An ieQTL  
511 (chr12:112,919,404) against an isoform (NM\_016816.3) of the 2'-5'-*oligoadenylate synthetase*  
512 *I (OASI)* gene, which is related to innate immunity, was reported to be associated with SLE  
513 (Systemic lupus erythematosus). NM\_016816.3 encode different amino acid sequences from  
514 major isoforms (ENST00000452357), and the differences may have a functional effect  
515 (Additional file 2: Table S17). Moreover, our ieQTL analysis identified different genes from  
516 GWAS-predicted causative genes. For example, one variant (chr14:35,292,469) was reported to  
517 associate with allergy diseases (asthma, hay fever and eczema) in the GWAS database, and  
518 *proteasome 20S subunit alpha 6 (PSMA6)* was a predicted to be a causative gene. However, that  
519 variant was an ieQTL (XM\_005267782.3) in *protein phosphatase 2 regulatory subunit B*  
520 *gamma (PPP2R3C)* gene. Because *PPP2R3C* encodes a subunit of protein phosphatase 2  
521 (PP2A), which is related to inflammatory responses (PP2A) [42], it may be another plausible  
522 causative gene of this association.

523 In this study, we examined ieQTLs using long-read sequencing technology.  
524 Consequently, our eQTL analysis uncovered numerous ieQTLs, pinpointing isoform-specific  
525 expression changes related to splice sites, histone marks, and enhancers. While the exact role of  
526 enhancers requires further clarification, our functional analysis revealed that regions distant  
527 from genes can regulate isoform expression. By combining our eQTLs with GWAS variants, we  
528 propose novel candidates for disease causation and mechanisms. We believe that delving into  
529 ieQTLs through long-read analyses will contribute significantly to our comprehension of the  
530 functional implications of genetic variations and the regulatory mechanisms governing  
531 isoforms.

532

533

#### 534 URLs

535 ENCODE database

536 [https://www.encodeproject.org/matrix/?type=Experiment&control\\_type!=\\*&status=released&p](https://www.encodeproject.org/matrix/?type=Experiment&control_type!=*&status=released&p)

537 [erturbed=false](#)

538 eQTL from GTEx database <https://www.gtexportal.org/home/>



539 GWAS catalog database <https://www.ebi.ac.uk/gwas/>

540 HaploReg website <https://pubs.broadinstitute.org/mammals/haploreg/haploreg.php>

541 SpliceAI <https://spliceailookup.broadinstitute.org>

542 GSDS (Gene Structure Display Server) 2.0 <http://gsds.gao-lab.org/index.php>

543 Coriell Institute <https://www.coriell.org>

544

#### 545 **Declarations**

#### 546 **Funding**

547 This research was supported by AMED under Grant Number JP21km0908001 (A.F.)

548 and Takeda Science Foundation (A.F.)

549

#### 550 **Availability of data and materials**

551 Nanopore MinION long-reads sequencing data is available from the Japanese

552 Genotype-phenotype Archive (JGA) database. Accession number: XXXXXXXXXX.

553

#### 554 **Authors' contributions**

555 AF designed the study. YN, MS, RK and AF performed the computational analyses.

556 YN, MS, AI and AF performed the experiments. YN, TK, UM and AF interpreted the

557 results. YN and AF wrote the manuscript. All authors approved the final manuscript.

558

### 559 **Competing interests**

560 The authors declare that they have no competing interests.

561

### 562 **Acknowledgements**

563 The super-computing resource was provided by the Human Genome Centre, Institute of  
564 Medical Science, the University of Tokyo.

565

### 566 **Figure legends**

567 **Figure 1** Isoform eQTLs (ieQTLs) and gene eQTLs.

568 (A) Genes and isoforms. Multiple isoforms can be expressed from a single gene. Gray  
569 boxes, a solid line, and dotted lines indicate exons, introns, and splicing patterns,  
570 respectively.

571 (B) Patterns of gene eQTLs (green) and ieQTLs (yellow and blue) by genotype (0, 1,  
572 and 2). Gene eQTLs are identified through the expression levels of entire genes, while  
573 ieQTLs are detected based on the expression levels of individual isoforms.

574 (C) Differential ieQTLs and opposite ieQTLs. Differential ieQTLs are ieQTLs that  
575 exhibit significantly different effects on distinct isoforms. Opposite ieQTLs are  
576 differential ieQTLs with contrary effects on different isoforms.

577 (D) Venn diagram of number of gene eQTLs (green) and ieQTLs (yellow) identified in  
578 this study.

579 (E) Number of total ieQTLs (orange), differential ieQTLs (red), and opposite ieQTLs  
580 (blue) identified in this study.

581 (F) Distribution of  $p$ -values ( $\log_{10}$ ) from gene-level (green), common (brown), and  
582 isoform-level (yellow) analyses.

583

584 **Figure 2** Functional enrichment analysis of eQTLs

585 eQTLs were categorized into gene eQTL-specific (green), common (brown), and  
586 ieQTL-specific (yellow) groups. Functional enrichment was assessed for gene region  
587 annotations (A), super enhancers and regulatory regions (B), as well as transcription  
588 binding sites (TFBS) and major active and suppressive histone marks (ENCODE),  
589 which could associate with splicing (C).  
590 eQTLs were categorized into gene eQTL-specific (orange), differential ieQTL (red),  
591 and opposite ieQTL (blue) groups. A functional enrichment analysis was conducted for  
592 gene region annotations (D), super enhancers and regulatory regions (E), and TCFB and  
593 histone marks (F). The Y-axis indicates the Odds ratio. Presented are odds ratios and  
594 95% confidence intervals.

595

596 **Figure 3** Effects of ieQTLs.

597 (A) Distribution of gene eQTL-specific (green), common (gray), and ieQTL-specific  
598 (yellow) variants relative to the gene body. Gene size was adjusted to 25,000 bp, which  
599 is the average gene size. TSS, transcription start site; TES, transcription end site.  
600 (B) Comparison of amino acid sequences and functional motifs between major isoforms  
601 and minor isoforms affected by ieQTLs.  
602 (C) Number of GWAS hits found in gene eQTL-specific (green, n = 22), common  
603 (brown, n = 183), and ieQTL-specific (yellow, n = 379). Red bars indicate B-cell or  
604 autoimmune diseases in GWAS hits.

605

606 **Figure 4** Minigene splicing assay for *IFI44L* and *GAS2*

607 (A) Structure of *IFI44L* gene and the surrounding area of rs1333973. Exons and introns  
608 are depicted with bold and thin lines, respectively. This figure was obtained from the  
609 UCSC genome browser.  
610 (B) Isoforms of *IFI44L*. Isoform structures are depicted using GSDS 2.0.  
611 (C) Motif prediction for NM\_006820.3 and XM\_005270391.3 using HMMER software.  
612 MMR\_HSR1, G-alpha, AIG1, AAA-PrkA, and ATP\_bind\_1 domains/motifs were  
613 predicted in CDS of NM\_006820, while no domain/motif was predicted in CDS of  
614 XM\_005270391.3.  
615 (D) Boxplot displaying gene expressions in the 67 Japanese B cell lines. The expression  
616 levels of the entire *IFI44L* gene (left) and four isoforms are presented by genotypes (AA  
617 (n = 42), AT (n = 23), and TT (n = 2)).  
618 (E) Agarose gel electrophoresis of RT-PCR products expressed from *IFI44L* (exon 2  
619 and exon 3) minigenes in HEK293 cells. M: 100 bp ladder marker. Lane 1: pSPL3 +  
620 *IFI44L*(IVS2+3A). Lane 2: pSPL3 + *IFI44L*(IVS2+3T). Lane 3: Negative control. Blue

621 box: exon of pSPL3 plasmid, green box: exon 2 of *IFI44L*, orange box: exon 3 of  
622 *IFI44L*.  
623 (F) Structure of *GAS2* gene and the surrounding area of rs11026723. Exons and introns  
624 are shown using bold and thin lines. This figure was obtained from the UCSC genome  
625 browser.  
626 (G) Isoforms of *GAS2*. Isoform structures are depicted using GSDS 2.0.  
627 (H) Boxplot showing gene expressions in the 67 Japanese B cell lines. The expression  
628 levels of the entire *GAS2* gene (left) and isoforms are presented by genotypes (GG (n =  
629 16), GA (n = 36), and AA(n = 15)).  
630 (I) Agarose gel electrophoresis of RT-PCR products expressed from *GAS2* (exon 1)  
631 minigenes in HEK293 cells. In this experiment, a modified pSPL3 plasmid was utilized  
632 (Additional file 1; Figure S1). M: marker (DNA ladder One (Nacalai)). Lane 1: pSPL3  
633 + *GAS2* (IVS1+3A) (RT+). Lane 2: pSPL3 + *GAS2* (IVS1+3G) (RT+). Lane 3: pSPL3  
634 + *GAS2* (IVS1+3A) (RT-). Lane 4: pSPL3 + *GAS2* (IVS1+3G) (RT-). Lane 5:  
635 pSPL3-*GAS2* plasmid. A purified plasmid was used as the PCR template. Lane 6:  
636 Negative control. RT: Reverse transcription. The size of the upper band in lanes 1 and 2  
637 was the same as the amplicon in lane 5, suggesting the presence of an unspliced  
638 transcript. Blue box: exon of pSPL3 plasmid, green box: exon 1 of *GAS2*.

639

640 **Figure 5** Effects of a deletion in HEK293 on gene expression.

641 (A) Location of rs11191660 within the *ATP5MK* gene.  
642 (B) Four isoforms, ENST00000369825.5, NM\_001206426.1, NM\_001206427.1,  
643 NM\_032747.3, of *ATP5MK*. Isoform structures are depicted using GSDS 2.0.  
644 (C) Boxplot displaying gene expressions in the 67 Japanese B cell lines. The expression  
645 levels of the entire *ATP5MK* gene (left) and isoforms are presented by genotype (GG (n  
646 = 28), GA (n = 27), and AA (n = 12)).  
647 (D) Comparison of gene expression levels between HEK293 cells with and without the  
648 chr10:103,342,876-103,343,562 deletion. *ACTB* was used as an internal control. The  
649 y-axis shows relative expression of the target variants in cells with the deletion  
650 compared to cells with no deletion, which is calculated as 1.0. A significant difference  
651 was observed in the gene expression levels of NM\_032747.3 between cells with and  
652 without the deletion. Bar graphs are shown as the mean value  $\pm$  standard error (s.e.).  
653 P-values were obtained by the student's t-test.

654

655 **References**

- 656 1. Albert FW, Kruglyak L. The role of regulatory variation in complex traits and disease.  
657 Nat Rev Genet. Nature Publishing Group; 2015;16:197–212.
- 658 2. Qi T, Wu Y, Fang H, Zhang F, Liu S, Zeng J, et al. Genetic control of RNA splicing  
659 and its distinct role in complex trait variation. Nat Genet. Springer US;  
660 2022;54:1355–63.
- 661 3. Dong P, Hoffman GE, Apontes P, Bendl J, Rahman S, Fernando MB, et al.  
662 Population-level variation in enhancer expression identifies disease mechanisms in the  
663 human brain. Nat Genet. 2022;54:1493–503.
- 664 4. Wong JH, Shigemizu D, Yoshii Y, Akiyama S, Tanaka A, Nakagawa H, et al.  
665 Identification of intermediate-sized deletions and inference of their impact on gene  
666 expression in a human population. Genome Med. Genome Medicine; 2019;11:44.
- 667 5. Ashouri S, Wong JH, Nakagawa H, Shimada M, Tokunaga K, Fujimoto A.  
668 Characterization of intermediate-sized insertions using whole-genome sequencing data  
669 and analysis of their functional impact on gene expression. Hum Genet. Springer Berlin  
670 Heidelberg; 2021;140:1201–16. Available from:  
671 <https://doi.org/10.1007/s00439-021-02291-2>
- 672 6. Gymrek M, Willems T, Guilmatre A, Zeng H, Markus B, Georgiev S, et al. Abundant  
673 contribution of short tandem repeats to gene expression variation in humans. Nat Genet.  
674 2015;48:22–9.
- 675 7. Uffelmann E, Huang QQ, Munung NS, de Vries J, Okada Y, Martin AR, et al.  
676 Genome-wide association studies. Nat Rev Methods Prim. Springer US; 2021;1.  
677 Available from: <http://dx.doi.org/10.1038/s43586-021-00056-9>
- 678 8. Ratnapriya R, Sosina OA, Starostik MR, Kwicklis M, Kapphahn RJ, Fritsche LG, et  
679 al. Retinal transcriptome and eQTL analyses identify genes associated with age-related  
680 macular degeneration. Nat Genet. 2019;51:606–10.
- 681 9. Aragam KG, Jiang T, Goel A, Kanoni S, Wolford BN, Atri DS, et al. Discovery and  
682 systematic characterization of risk variants and genes for coronary artery disease in over  
683 a million participants. Nat Genet. 2022;54:1803–15.
- 684 10. Yao DW, O'Connor LJ, Price AL, Gusev A. Quantifying genetic effects on disease  
685 mediated by assayed gene expression levels. Nat Genet. 2020;52:626–33. Available  
686 from: <https://doi.org/10.1038/s41588-020-0625-2>
- 687 11. Scotti MM, Swanson MS. RNA mis-splicing in disease. Nat Rev Genet. Nature  
688 Publishing Group; 2016;17:19–32.
- 689 12. Banday AR, Stanifer ML, Florez-Vargas O, Onabajo OO, Papenberg BW, Zahoor  
690 MA, et al. Genetic regulation of OAS1 nonsense-mediated decay underlies association

- 691 with COVID-19 hospitalization in patients of European and African ancestries. *Nat*  
692 *Genet.* 2022;54:1103–16.
- 693 13. Wu H, Lu Y, Duan Z, Wu J, Lin M, Wu Y, et al. Nanopore long-read RNA  
694 sequencing reveals functional alternative splicing variants in human vascular smooth  
695 muscle cells. *Commun Biol.* Springer US; 2023;6:1–12.
- 696 14. Kiyose H, Nakagawa H, Ono A, Aikata H, Ueno M, Hayami S, et al.  
697 Comprehensive analysis of full-length transcripts reveals novel splicing abnormalities  
698 and oncogenic transcripts in liver cancer. *PLoS Genet.* 2022;18:1–28. Available from:  
699 <http://dx.doi.org/10.1371/journal.pgen.1010342>
- 700 15. Sun Q, Han Y, He J, Wang J, Ma X, Ning Q, et al. Long-read sequencing reveals  
701 the landscape of aberrant alternative splicing and novel therapeutic target in colorectal  
702 cancer. *Genome Med.* BioMed Central; 2023;15:1–24. Available from:  
703 <https://doi.org/10.1186/s13073-023-01226-y>
- 704 16. Veiga DFT, Nesta A, Zhao Y, Mays AD, Huynh R, Rossi R, et al. A comprehensive  
705 long-read isoform analysis platform and sequencing resource for breast cancer. *Sci Adv.*  
706 2022;8:1–14.
- 707 17. Yamaguchi K, Ishigaki K, Suzuki A, Tsuchida Y, Tsuchiya H, Sumitomo S, et al.  
708 Splicing QTL analysis focusing on coding sequences reveals mechanisms for disease  
709 susceptibility loci. *Nat Commun.* Springer US; 2022;13:1–13.
- 710 18. Glinos DA, Garborcauskas G, Hoffman P, Ehsan N, Jiang L, Gokden A, et al.  
711 Transcriptome variation in human tissues revealed by long-read sequencing. *Nature.*  
712 Springer US; 2022.
- 713 19. Auton A, Abecasis GR, Altshuler DM, Durbin RM, Bentley DR, Chakravarti A, et  
714 al. A global reference for human genetic variation. *Nature.* 2015;526:68–74.
- 715 20. Li H. Minimap2: Pairwise alignment for nucleotide sequences. *Bioinformatics.*  
716 2018;34:3094–100.
- 717 21. Purcell S, Neale B, Todd-Brown K, Thomas L, Ferreira MAR, Bender D, et al.  
718 PLINK: A tool set for whole-genome association and population-based linkage analyses.  
719 *Am J Hum Genet.* 2007;81:559–75.
- 720 22. Kadri NK, Mapel XM, Pausch H. The intronic branch point sequence is under  
721 strong evolutionary constraint in the bovine and human genome. *Commun Biol.*  
722 Springer US; 2021;4:1–13.
- 723 23. Birney E, Clamp M, Durbin R. GeneWise and Genomewise. *Genome Res.*  
724 2004;14:988–95. Available from: [www.genome.org](http://www.genome.org)
- 725 24. Khan A, Zhang X. dbSUPER: a database of super-enhancers in mouse and human  
726 genome. *Nucleic Acids Res.* 2016;44. Available from: <http://bioinfo.au>.

- 727 25. ENCODE Project Consortium. An integrated encyclopedia of DNA elements in the  
728 human genome ENCODE Encyclopedia of DNA Elements. *Nature*. 2012;488.  
729 Available from: <http://encodeproject.org/ENCODE/>
- 730 26. Shabalin AA. Matrix eQTL: Ultra fast eQTL analysis via large matrix operations.  
731 *Bioinformatics*. 2012;28:1353–8. Available from:  
732 [http://www.bios.unc.edu/research/genomic\\_software/Matrix\\_eQTL](http://www.bios.unc.edu/research/genomic_software/Matrix_eQTL)
- 733 27. Benner C, Spencer CCA, Havulinna AS, Salomaa V, Ripatti S, Pirinen M.  
734 FINEMAP: Efficient variable selection using summary data from genome-wide  
735 association studies. *Bioinformatics*. 2016;32:1493–501. Available from:  
736 <http://www.christianbenner.com>.
- 737 28. Strober BJ, Wen X, Wucher V, Kwong A, Lappalainen T, Li X, et al. The GTEx  
738 Consortium atlas of genetic regulatory effects across human tissues. *Science* (80- ).  
739 2020;18:1318–30.
- 740 29. Buniello A, MacArthur JAL, Cerezo M, Harris LW, Hayhurst J, Malangone C, et al.  
741 The NHGRI-EBI GWAS Catalog of published genome-wide association studies,  
742 targeted arrays and summary statistics 2019. *Nucleic Acids Res. Oxford University*  
743 *Press*; 2019;47:D1005–12.
- 744 30. Jaganathan K, Kyriazopoulou Panagiotopoulou S, McRae JF, Darbandi SF,  
745 Knowles D, Li YI, et al. Predicting Splicing from Primary Sequence with Deep  
746 Learning. *Cell. Elsevier*; 2019;176:535-548.e24. Available from:  
747 <http://dx.doi.org/10.1016/j.cell.2018.12.015>
- 748 31. Eddy SR. Accelerated profile HMM searches. *PLoS Comput Biol*. 2011;7:1002195.  
749 Available from: [www.ploscompbiol.org](http://www.ploscompbiol.org)
- 750 32. Chandra V, Bhattacharyya S, Schmiedel BJ, Madrigal A, Gonzalez-Colin C, Fotsing  
751 S, et al. Promoter-interacting expression quantitative trait loci are enriched for  
752 functional genetic variants. *Nat Genet*. 2021;53:110–9. Available from:  
753 <https://doi.org/10.1038/s41588-020-00745-3>
- 754 33. Agirre E, Oldfield AJ, Bellora N, Segelle A, Luco RF. Splicing-associated  
755 chromatin signatures: a combinatorial and position-dependent role for histone marks in  
756 splicing definition. *Nat Commun*. 2021;12:1–16.
- 757 34. Ward LD, Kellis M. HaploReg v4: Systematic mining of putative causal variants,  
758 cell types, regulators and target genes for human complex traits and disease. *Nucleic*  
759 *Acids Res*. 2016;44:D877–81. Available from:  
760 <https://academic.oup.com/nar/article/44/D1/D877/2503117>
- 761 35. Phanstiel DH, Van Bortle K, Spacek D, Hess GT, Shamim MS, Machol I, et al.  
762 Static and Dynamic DNA Loops form AP-1-Bound Activation Hubs during

763 Macrophage Development. *Mol Cell*. Elsevier Inc.; 2017;67:1037-1048.e6. Available  
764 from: <http://dx.doi.org/10.1016/j.molcel.2017.08.006>

765 36. Mucaki EJ, Shirley BC, Rogan PK. Expression Changes Confirm Genomic Variants  
766 Predicted to Result in Allele-Specific, Alternative mRNA Splicing. *Front Genet*.  
767 2020;11:1–16.

768 37. Connally N, Nazeen S, Lee D, Shi H, Stamatoyannopoulos J, Chun S, et al. The  
769 missing link between genetic association and regulatory function. *Elife*. 2022;11:1–35.

770 38. Haralambieva IH, Ovsyannikova IG, Kennedy RB, Larrabee BR, Zimmermann MT,  
771 Grill DE, et al. Genome-wide associations of CD46 and IFI44L genetic variants with  
772 neutralizing antibody response to measles vaccine. *Hum Genet*. Springer Berlin  
773 Heidelberg; 2017;136:421–35.

774 39. Akiyama M, Ishigaki K, Sakaue S, Momozawa Y, Horikoshi M, Hirata M, et al.  
775 Characterizing rare and low-frequency height-associated variants in the Japanese  
776 population. *Nat Commun*. 2019;10. Available from:  
777 <https://doi.org/10.1038/s41467-019-12276-5>

778 40. Karlsson Linnér R, Biroli P, Kong E, Meddens SFW, Wedow R, Fontana MA, et al.  
779 Genome-wide association analyses of risk tolerance and risky behaviors in over 1  
780 million individuals identify hundreds of loci and shared genetic influences. *Nat Genet*.  
781 2019;51:245–57.

782 41. Alarcón-Riquelme ME, Ziegler JT, Molineros J, Howard TD, Moreno-Estrada A,  
783 Sánchez-Rodríguez E, et al. Genome-Wide Association Study in an Amerindian  
784 Ancestry Population Reveals Novel Systemic Lupus Erythematosus Risk Loci and the  
785 Role of European Admixture. *Arthritis Rheumatol*. 2016;68:932–43.

786 42. Clark AR, Ohlmeyer M. Protein phosphatase 2A as a therapeutic target in  
787 inflammation and neurodegeneration. *Pharmacol Ther*. Elsevier Inc.; 2019;201:181–201.  
788 Available from: <https://doi.org/10.1016/j.pharmthera.2019.05.016>  
789



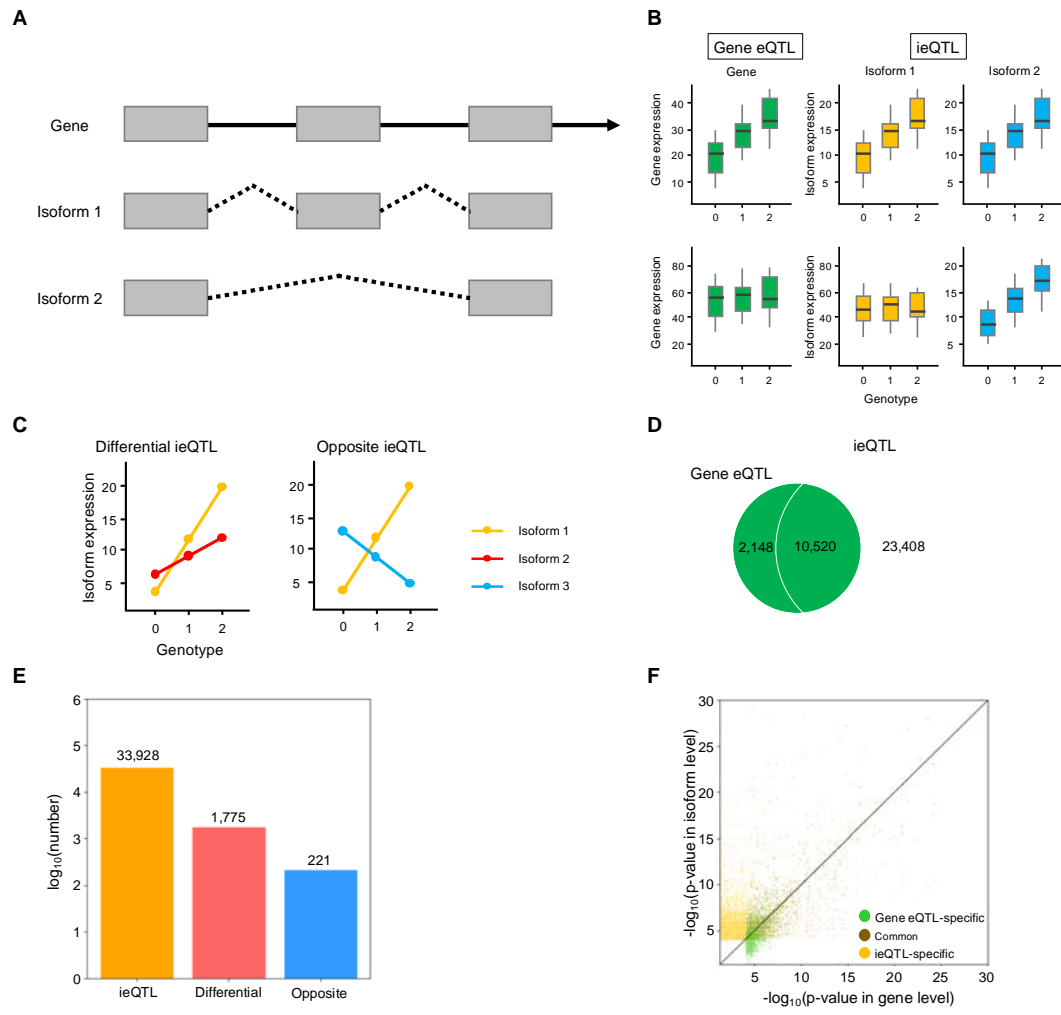

790

791 **Figure 1** Isoform eQTLs (ieQTLs) and gene eQTLs.

792 (A) Genes and isoforms. Multiple isoforms can be expressed from a single gene. Gray  
 793 boxes, a solid line, and dotted lines indicate exons, introns, and splicing patterns,  
 794 respectively.

795 (B) Patterns of gene eQTLs (green) and ieQTLs (yellow and blue) by genotype (0, 1,  
 796 and 2). Gene eQTLs are identified through the expression levels of entire genes, while  
 797 ieQTLs are detected based on the expression levels of individual isoforms.

798 (C) Differential ieQTLs and opposite ieQTLs. Differential ieQTLs are ieQTLs that  
 799 exhibit significantly different effects on distinct isoforms. Opposite ieQTLs are  
 800 differential ieQTLs with contrary effects on different isoforms.

801 (D) Venn diagram of number of gene eQTLs (green) and ieQTLs (yellow) identified in  
 802 this study.

803 (E) Number of total ieQTLs (orange), differential ieQTLs (red), and opposite ieQTLs  
804 (blue) identified in this study.  
805 (F) Distribution of  $p$ -values ( $\log_{10}$ ) from gene-level (green), common (brown), and  
806 isoform-level (yellow) analyses.  
807

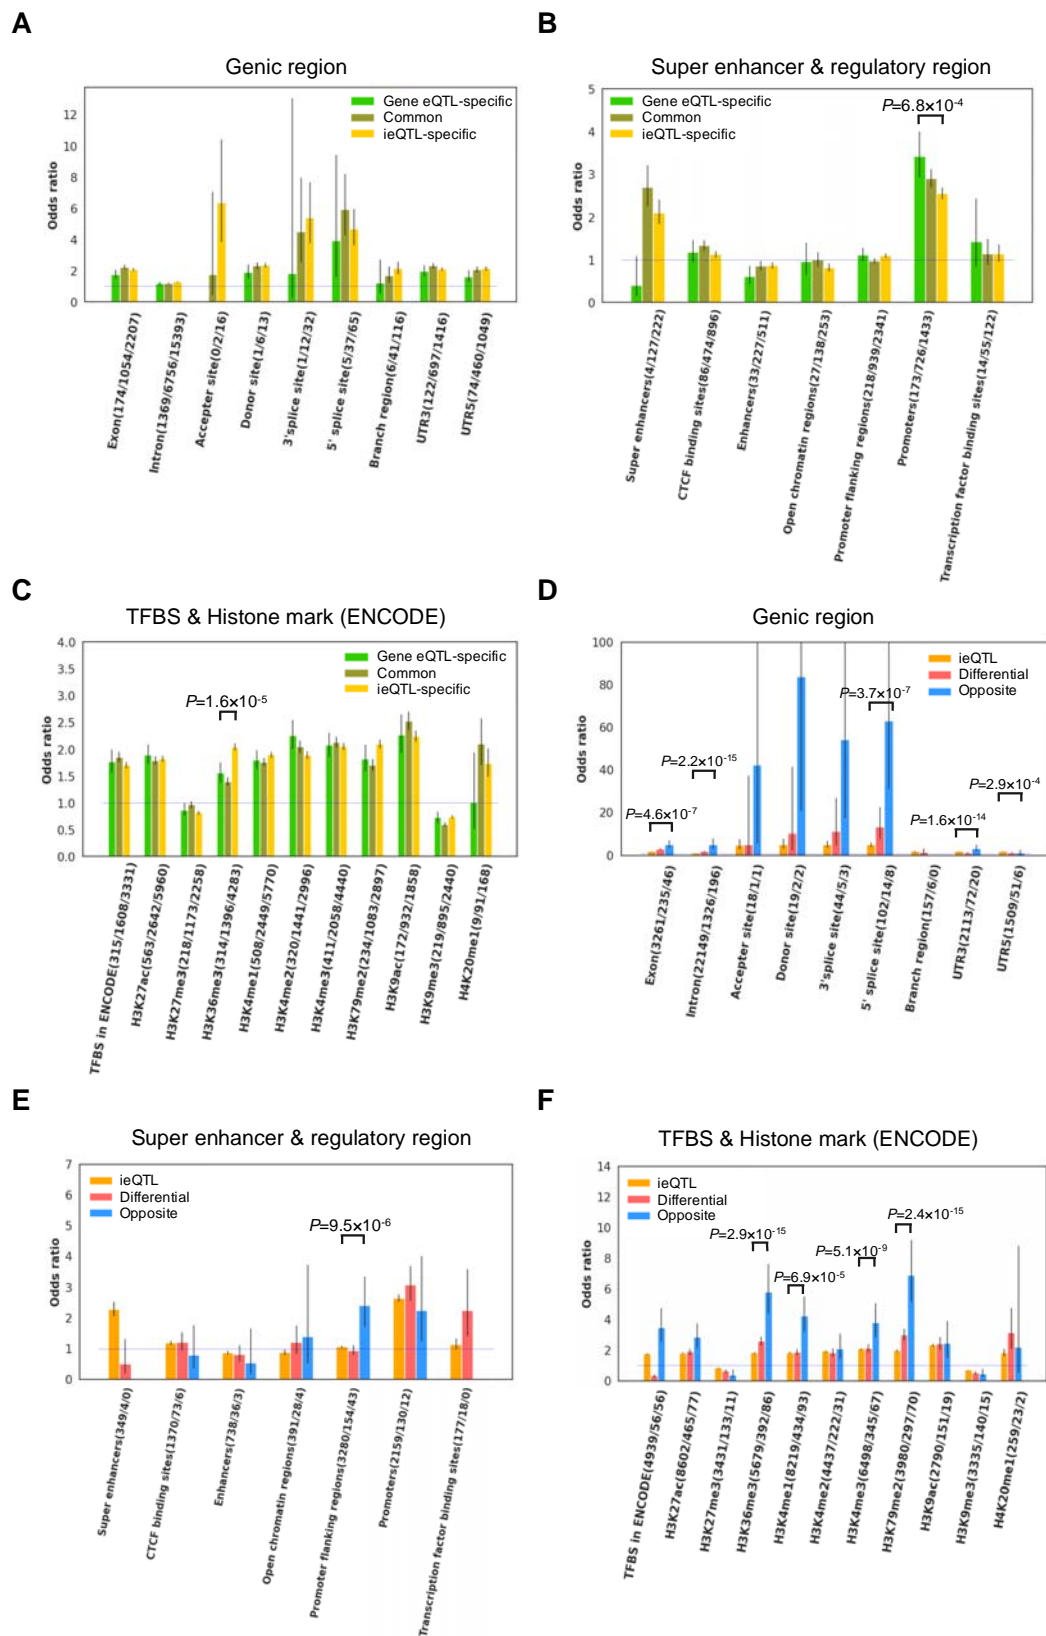

809 **Figure 2** Functional enrichment analysis of eQTLs

810 eQTLs were categorized into gene eQTL-specific (green), common (brown), and  
811 ieQTL-specific (yellow) groups. Functional enrichment was assessed for gene region  
812 annotations (A), super enhancers and regulatory regions (B), as well as transcription  
813 binding sites (TFBS) and major active and suppressive histone marks (ENCODE),  
814 which could associate with splicing (C).

815 eQTLs were categorized into gene eQTL-specific (orange), differential ieQTL (red),  
816 and opposite ieQTL (blue) groups. A functional enrichment analysis was conducted for  
817 gene region annotations (D), super enhancers and regulatory regions (E), and TCFB and  
818 histone marks (F). The Y-axis indicates the Odds ratio. Presented are odds ratios and  
819 95% confidence intervals.

820

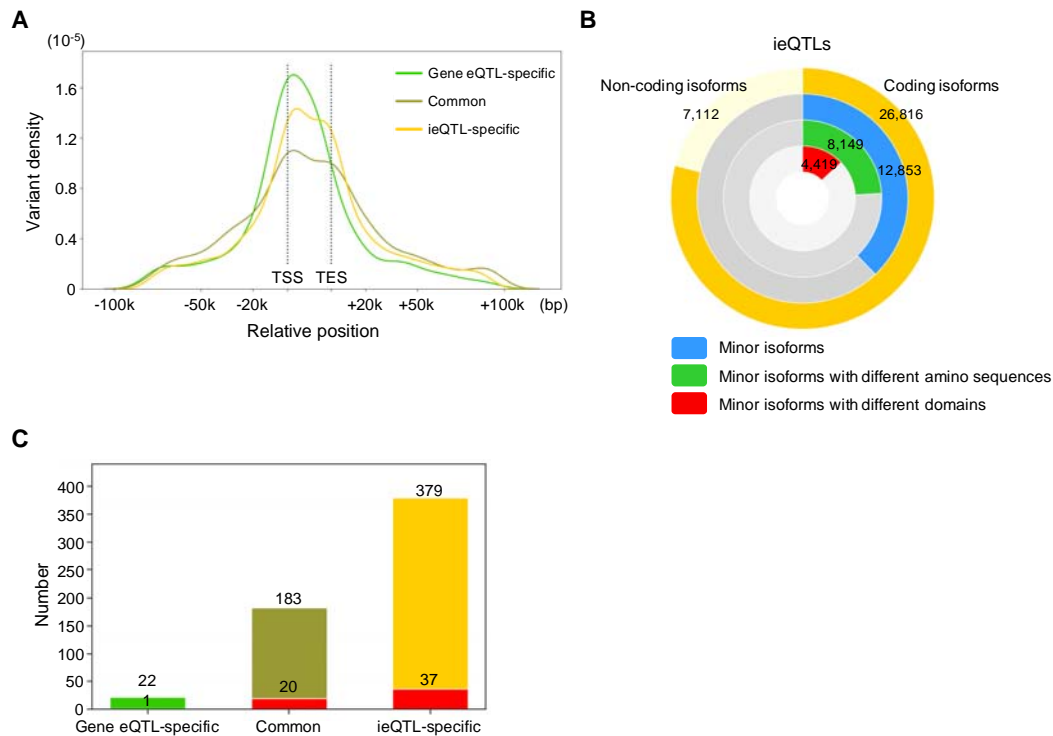

821

822 **Figure 3** Effects of ieQTLs.

823 (A) Distribution of gene eQTL-specific (green), common (gray), and ieQTL-specific  
824 (yellow) variants relative to the gene body. Gene size was adjusted to 25,000 bp, which  
825 is the average gene size. TSS, transcription start site; TES, transcription end site.

826 (B) Comparison of amino acid sequences and functional motifs between major isoforms  
827 and minor isoforms affected by ieQTLs.

828 (C) Number of GWAS hits found in gene eQTL-specific (green, n = 22), common  
829 (brown, n = 183), and ieQTL-specific (yellow, n = 379). Red bars indicate B-cell or  
830 autoimmune diseases in GWAS hits.

831

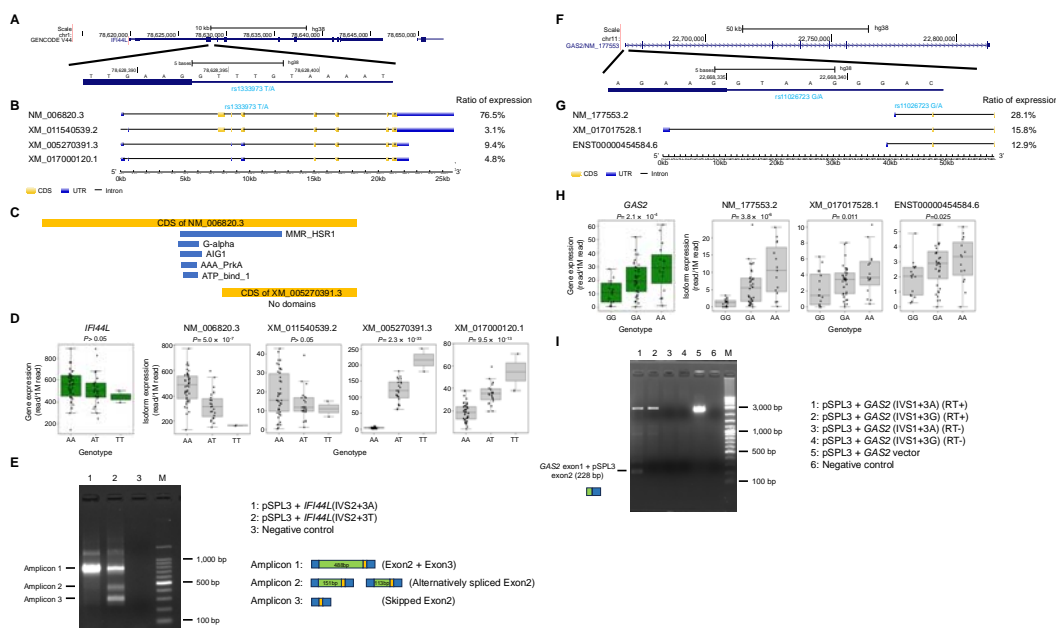

832

833 **Figure 4** Minigene splicing assay for *IFI44L* and *GAS2*

834 (A) Structure of *IFI44L* gene and the surrounding area of rs1333973. Exons and introns

835 are depicted with bold and thin lines, respectively. This figure was obtained from the

836 UCSC genome browser.

837 (B) Isoforms of *IFI44L*. Isoform structures are depicted using GSDS 2.0.

838 (C) Motif prediction for NM\_006820.3 and XM\_005270391.3 using HMMER software.

839 MMR\_HSR1, G-alpha, AIG1, AAA-PrkA, and ATP\_bind\_1 domains/motifs were

840 predicted in CDS of NM\_006820, while no domain/motif was predicted in CDS of

841 XM\_005270391.3.

842 (D) Boxplot displaying gene expressions in the 67 Japanese B cell lines. The expression

843 levels of the entire *IFI44L* gene (left) and four isoforms are presented by genotypes (AA

844 (n = 42), AT (n = 23), and TT (n = 2)).

845 (E) Agarose gel electrophoresis of RT-PCR products expressed from *IFI44L* (exon 2

846 and exon 3) minigenes in HEK293 cells. M: 100 bp ladder marker. Lane 1: pSPL3 +

847 *IFI44L*(IVS2+3A). Lane 2: pSPL3 + *IFI44L*(IVS2+3T). Lane 3: Negative control. Blue

848 box: exon of pSPL3 plasmid, green box: exon 2 of *IFI44L*, orange box: exon 3 of

849 *IFI44L*.

850 (F) Structure of *GAS2* gene and the surrounding area of rs11026723. Exons and introns

851 are shown using bold and thin lines. This figure was obtained from the UCSC genome

852 browser.

853 (G) Isoforms of *GAS2*. Isoform structures are depicted using GSDS 2.0.

854 (H) Boxplot showing gene expressions in the 67 Japanese B cell lines. The expression  
855 levels of the entire *GAS2* gene (left) and isoforms are presented by genotypes (GG (n =  
856 16), GA (n = 36), and AA(n = 15)).

857 (I) Agarose gel electrophoresis of RT-PCR products expressed from *GAS2* (exon 1)  
858 minigenes in HEK293 cells. In this experiment, a modified pSPL3 plasmid was utilized  
859 (Additional file 1; Figure S1). M: marker (DNA ladder One (Nacalai)). Lane 1: pSPL3  
860 + *GAS2* (IVS1+3A) (RT+). Lane 2: pSPL3 + *GAS2* (IVS1+3G) (RT+). Lane 3: pSPL3  
861 + *GAS2* (IVS1+3A) (RT-). Lane 4: pSPL3 + *GAS2* (IVS1+3G) (RT-). Lane 5:  
862 pSPL3-*GAS2* plasmid. A purified plasmid was used as the PCR template. Lane 6:  
863 Negative control. RT: Reverse transcription. The size of the upper band in lanes 1 and 2  
864 was the same as the amplicon in lane 5, suggesting the presence of an unspliced  
865 transcript. Blue box: exon of pSPL3 plasmid, green box: exon 1 of *GAS2*.

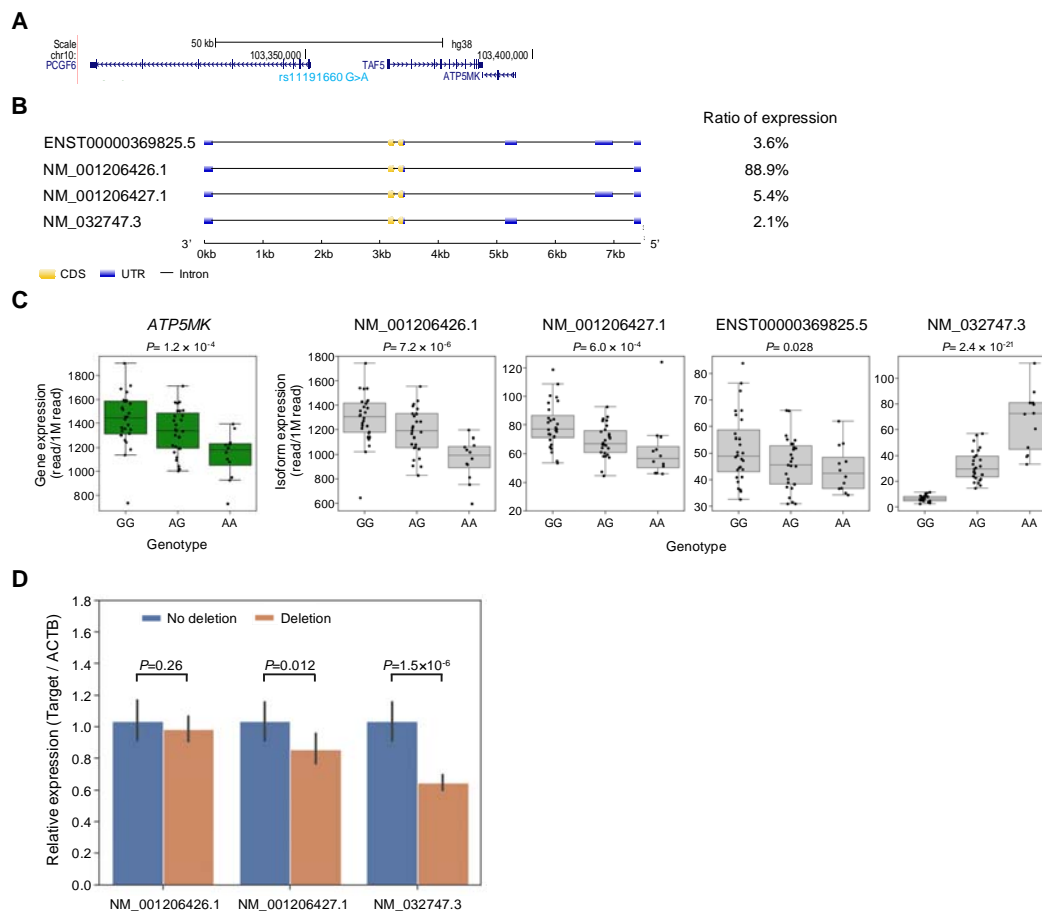

866

867 **Figure 5** Effects of a deletion in HEK293 on gene expression.

868 (A) Location of rs11191660 within the *ATP5MK* gene.

869 (B) Four isoforms, ENST00000369825.5, NM\_001206426.1, NM\_001206427.1,

870 NM\_032747.3, of *ATP5MK*. Isoform structures are depicted using GSDS 2.0.

871 (C) Boxplot displaying gene expressions in the 67 Japanese B cell lines. The expression

872 levels of the entire *ATP5MK* gene (left) and isoforms are presented by genotype (GG (n

873 = 28), GA (n = 27), and AA (n = 12)).

874 (D) Comparison of gene expression levels between HEK293 cells with and without the

875 chr10:103,342,876-103,343,562 deletion. *ACTB* was used as an internal control. The

876 y-axis shows relative expression of the target variants in cells with the deletion

877 compared to cells with no deletion, which is calculated as 1.0. A significant difference

878 was observed in the gene expression levels of NM\_032747.3 between cells with and

879 without the deletion. Bar graphs are shown as the mean value  $\pm$  standard error (s.e.).

880 P-values were obtained by the student's t-test.

881
